# Supplementary material for: Cu ion-exchanged and Cu nanoparticles decorated mesoporous ZSM-5 catalysts for the activation and utilization of phenylacetylene in a sustainable chemical synthesis
Source: Royal Society of Chemistry journal article supplement (doi:10.1039/c6ra19606c), 2016-01-01
Supplement: c6ra19606c1.pdf [file c6ra19606c1.pdf]

## Supporting Information

### **Cu ion-exchanged and Cu nanoparticles decorated mesoporous ZSM-5 catalysts for the activation and utilization of phenylacetylene in the sustainable chemical synthesis**

Bhaskar Sarmah<sup>a</sup>, Biswarup Satpati<sup>b</sup>, and Rajendra Srivastava<sup>\*a</sup>

*<sup>a</sup>Department of Chemistry, Indian Institute of Technology Ropar, Rupnagar-140001, India*

*<sup>b</sup>Surface Physics and Material Science Division, Saha Institute of Nuclear Physics, 1/AF, Bidhannagar, Kolkata 700 064, India*

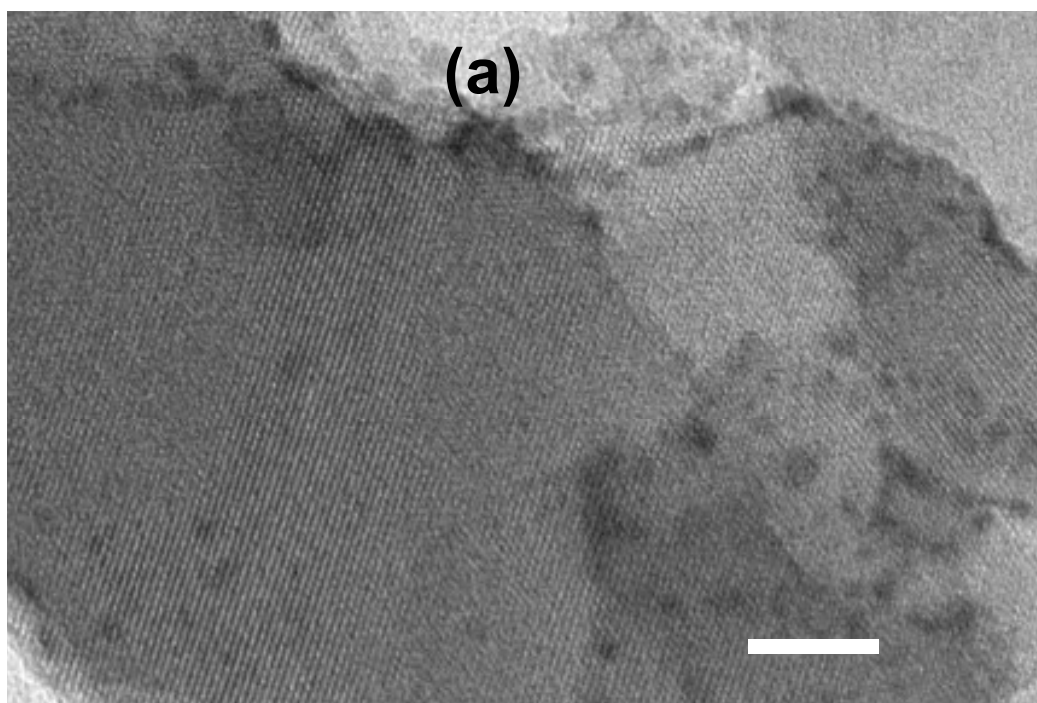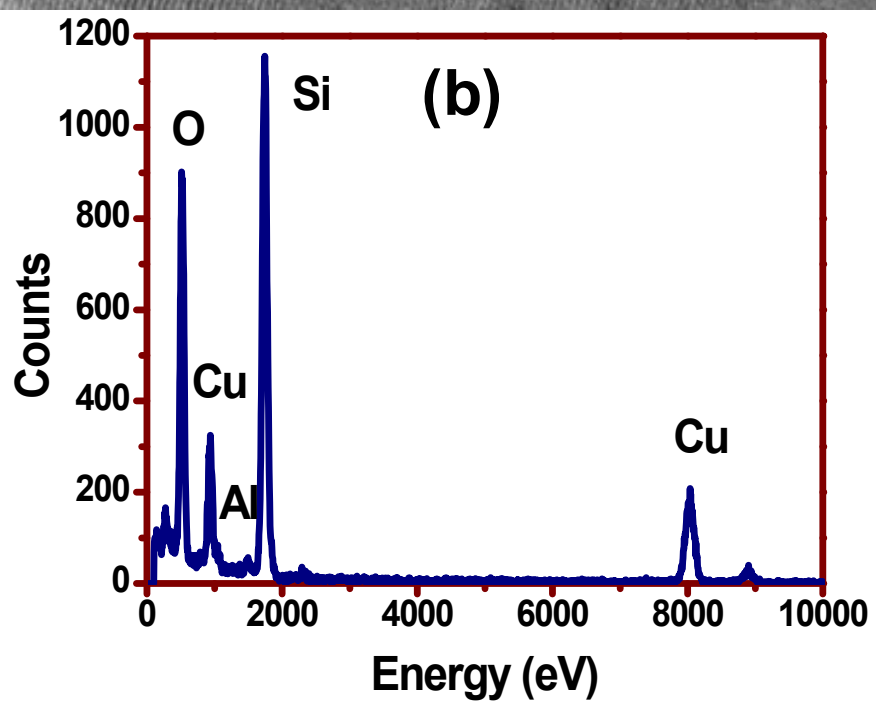

**Figure S1.** (a) HRTEM image and (b) EDX spectrum of Cu(10%)/Meso-ZSM-5

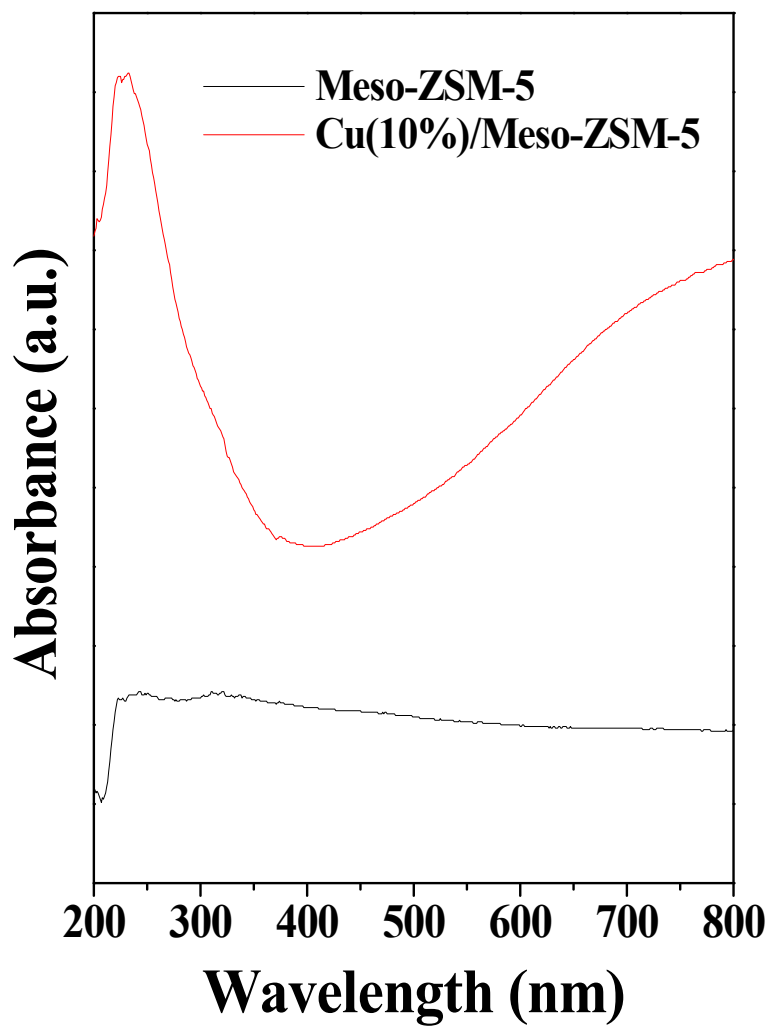

**Figure S2.** DR UV-Visible spectra of Meso-ZSM-5 and Cu(10%)/Meso-ZSM-5.

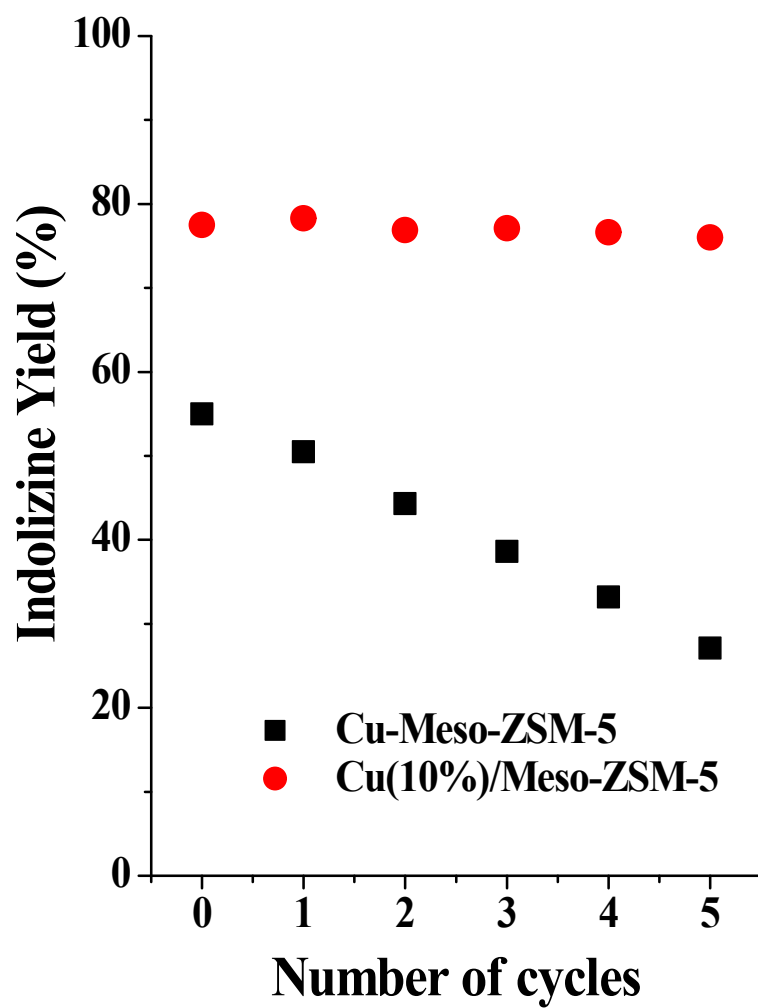

**Figure S3.** Catalytic performance of Cu-Meso-ZSM-5 and Cu(10%)/Meso-ZSM-5 during the recycling experiments up to five cycles.

## Synthesis of SBA-15

Mesoporous SBA-15 material was prepared using molar gel composition 1TEOS: 0.016 P123: 127 H<sub>2</sub>O: 0.46 HCl (35%) by the following reported procedure.<sup>1,2</sup> In a typical synthesis 6.11 g amphiphilic triblock copolymer P123 was dispersed in 100 g distilled water and stirred for 4 h at 300 K. Afterwards, 3.028 g conc. HCl diluted with 42.47 g distilled water was mixed to the above dispersed solution and stirred for 2 h to get a clear solution. After complete dissolution of P123, 14 g of TEOS was added drop wise to the resulting solution and allowed to stir for 20 h at 313 K. Finally, the resulting mixture was hydrothermally treated in a Teflon-lined autoclave at 373 K for 2 days. The solid product was filtered through Buchner funnel and washed several times with distilled water and dried at oven at 353 K and calcined at 823 K for 6 h.

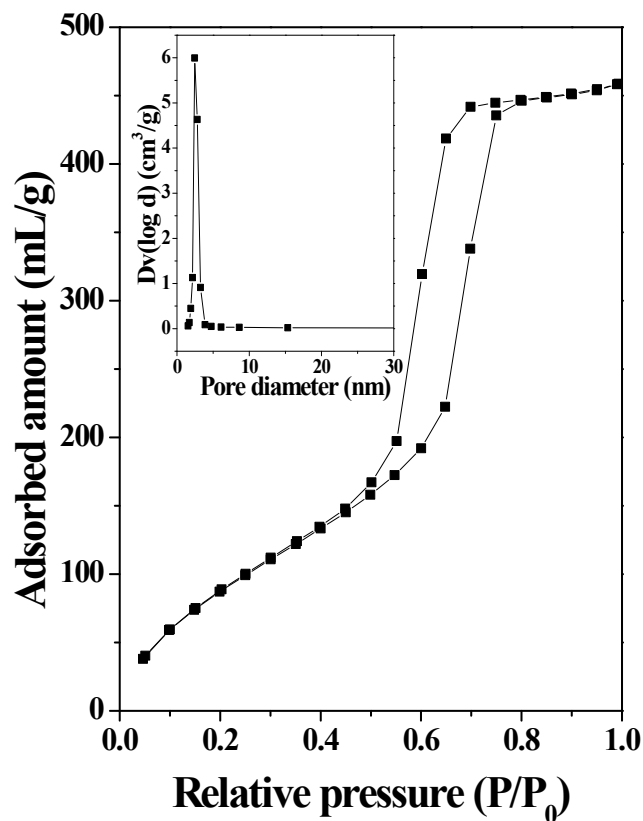

Fig. S4. N<sub>2</sub>-adsorption-desorption isotherm for SBA-15. Inset shows pore size distribution.

**Table S1.** Textural properties of SBA-15.

| Material | $S_{\text{BET}}$ (m <sup>2</sup> /g) | Ex. SA (m <sup>2</sup> /g) | $V_{\text{Total}}$ (mL/g) | Mesopore volume (mL/g) |
|----------|--------------------------------------|----------------------------|---------------------------|------------------------|
| SBA-15   | 624                                  | 553                        | 0.84                      | 0.79                   |

Reference:

1. R. Srivastava, D. Srinivas and P. Ratnasamy, *J. Catal.*, 2005, **233**, 1-15.

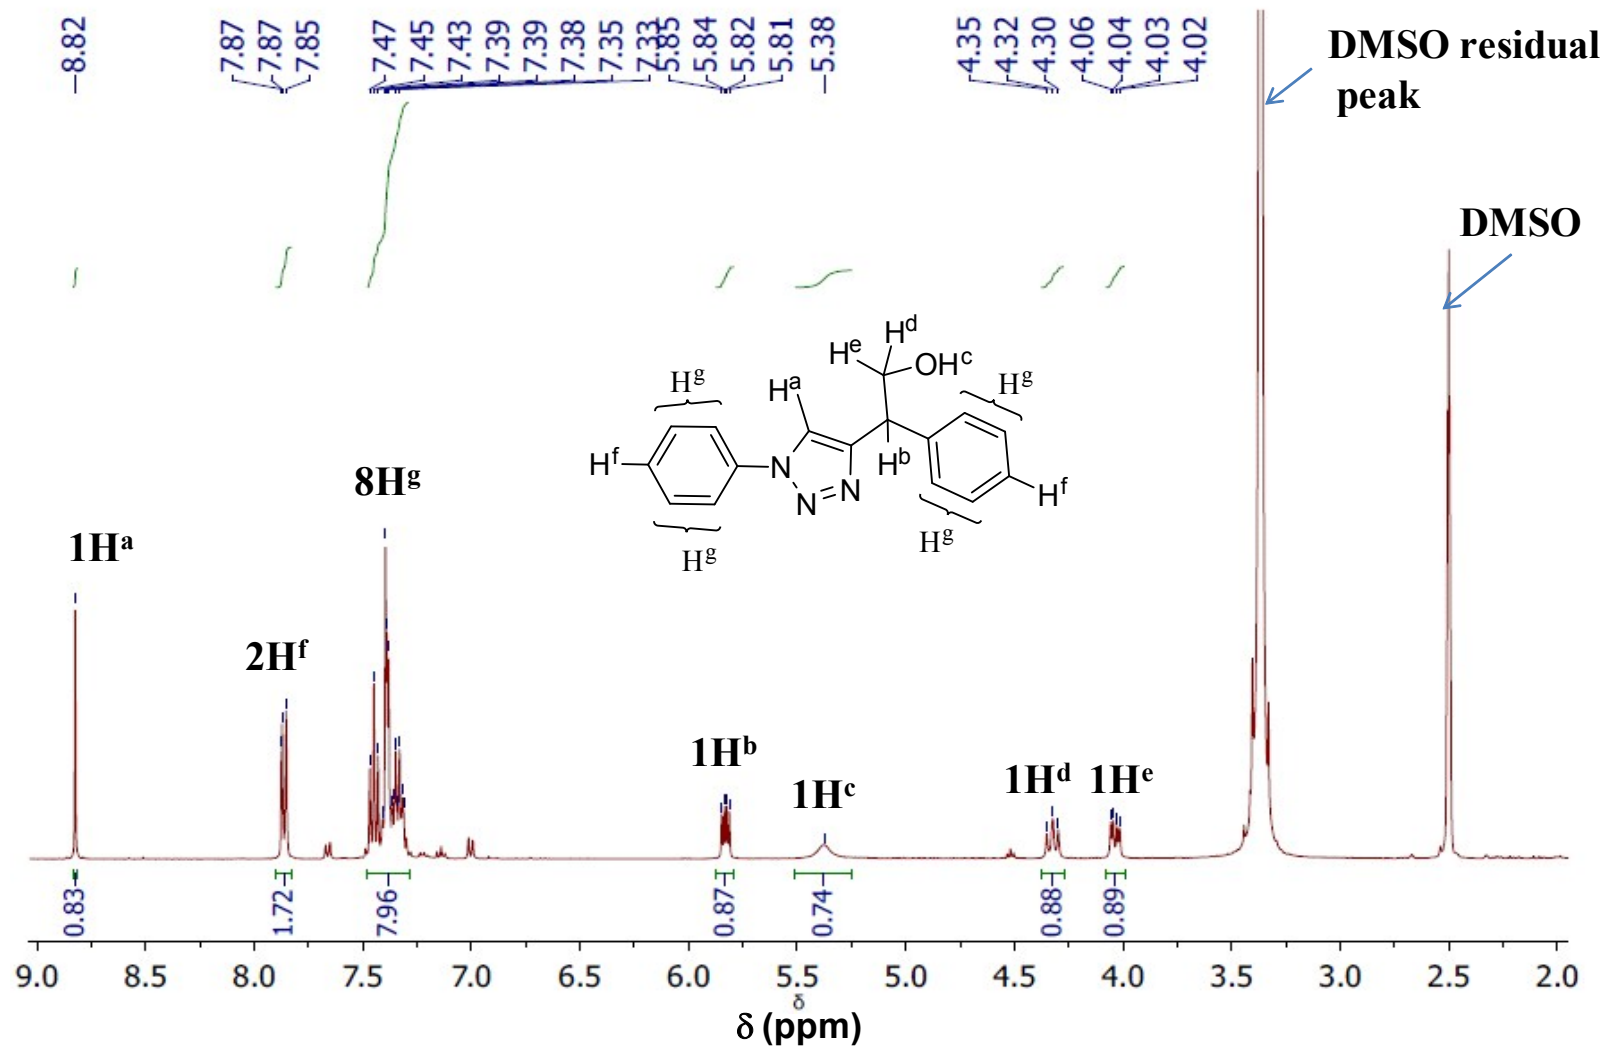

Figure S5.  $^1H$  NMR spectrum of 2-Phenyl-2-(4-phenyl-1H-1,2,3-triazol-1-yl)ethanol.

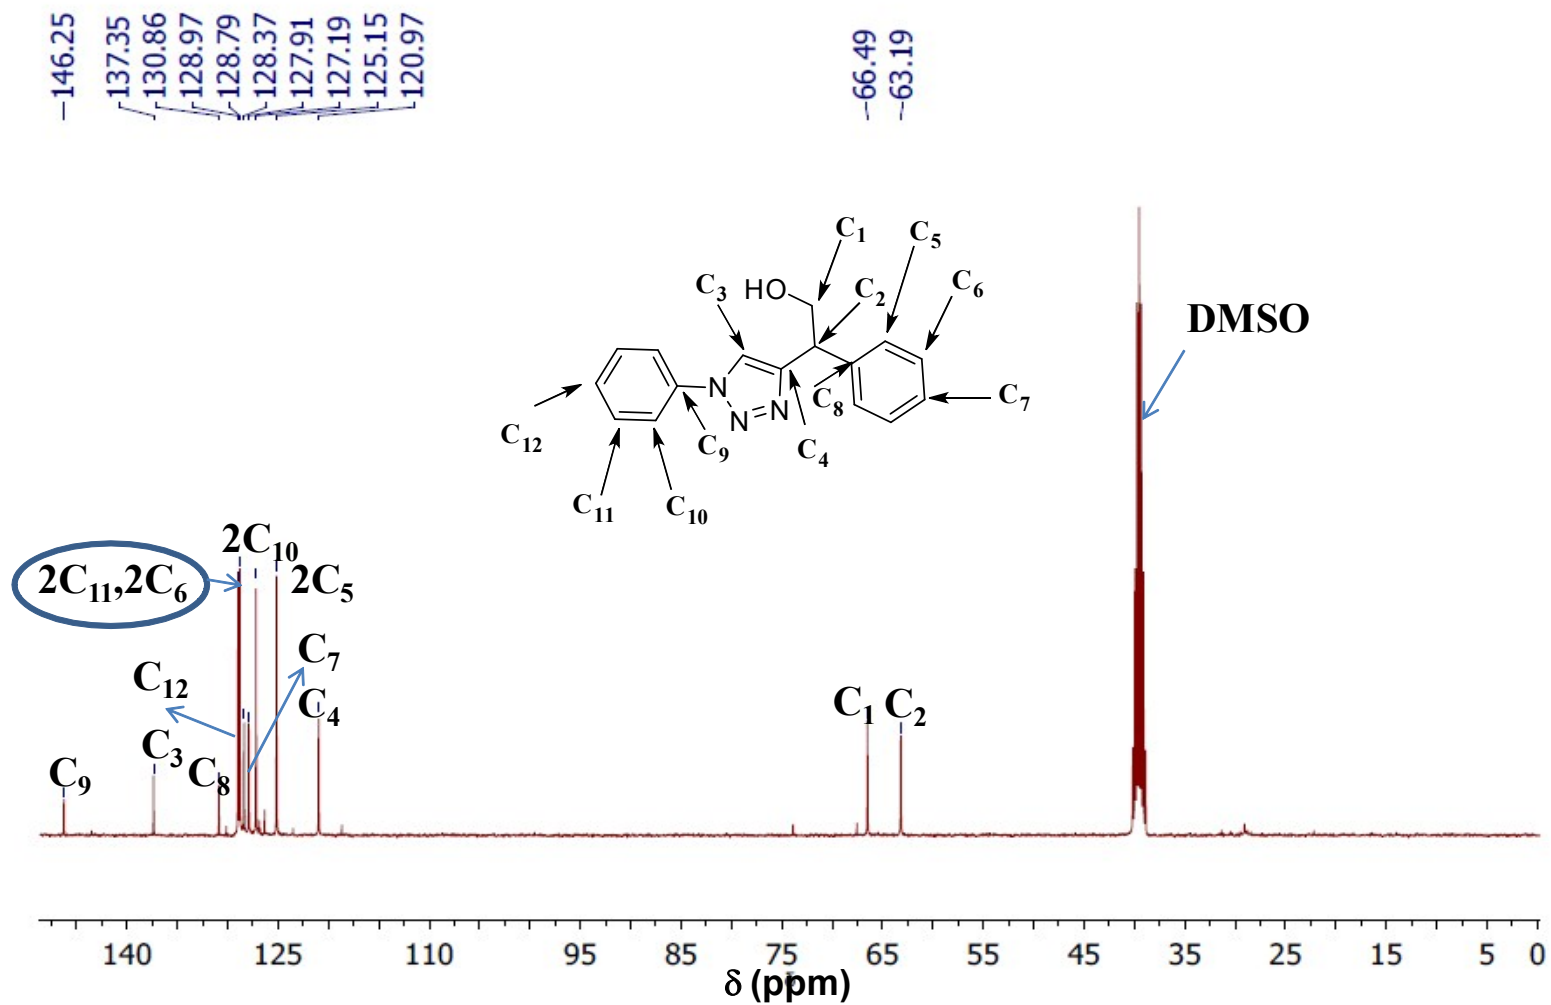

Figure S6. <sup>13</sup>C NMR spectrum of 2-Phenyl-2-(4-phenyl-1H-1,2,3-triazol-1-yl)ethanol.



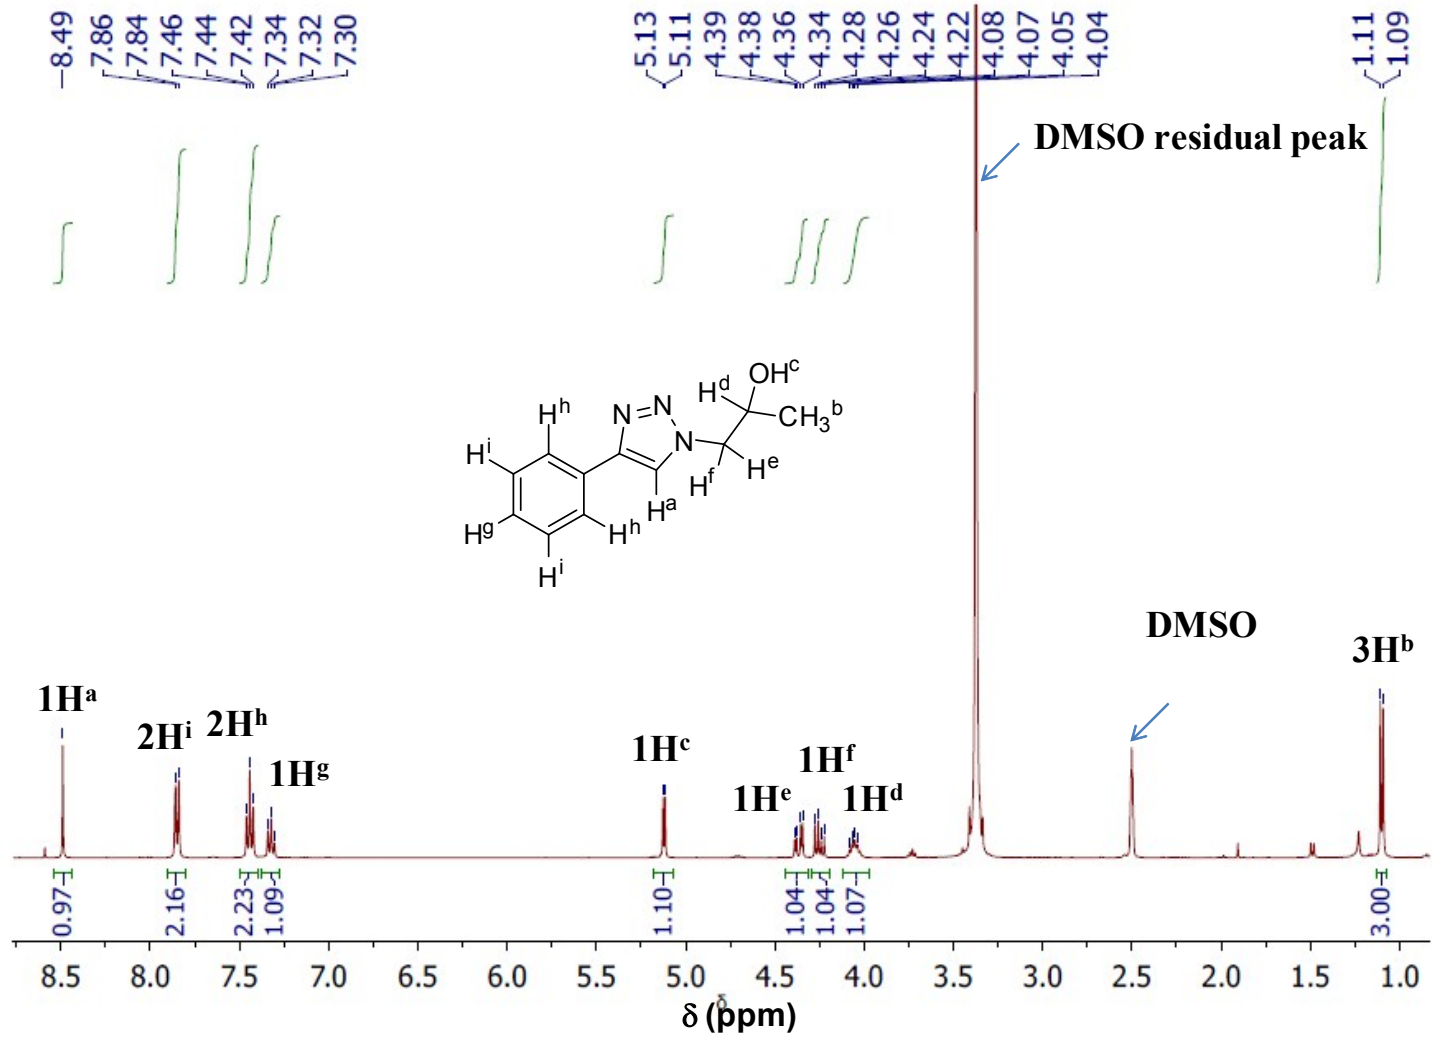

**Figure S7.**  $^1H$  NMR spectrum of 1-(4-Phenyl-1H-(4-phenyl-1,2,3-triazol-1-yl) propan-2-ol).

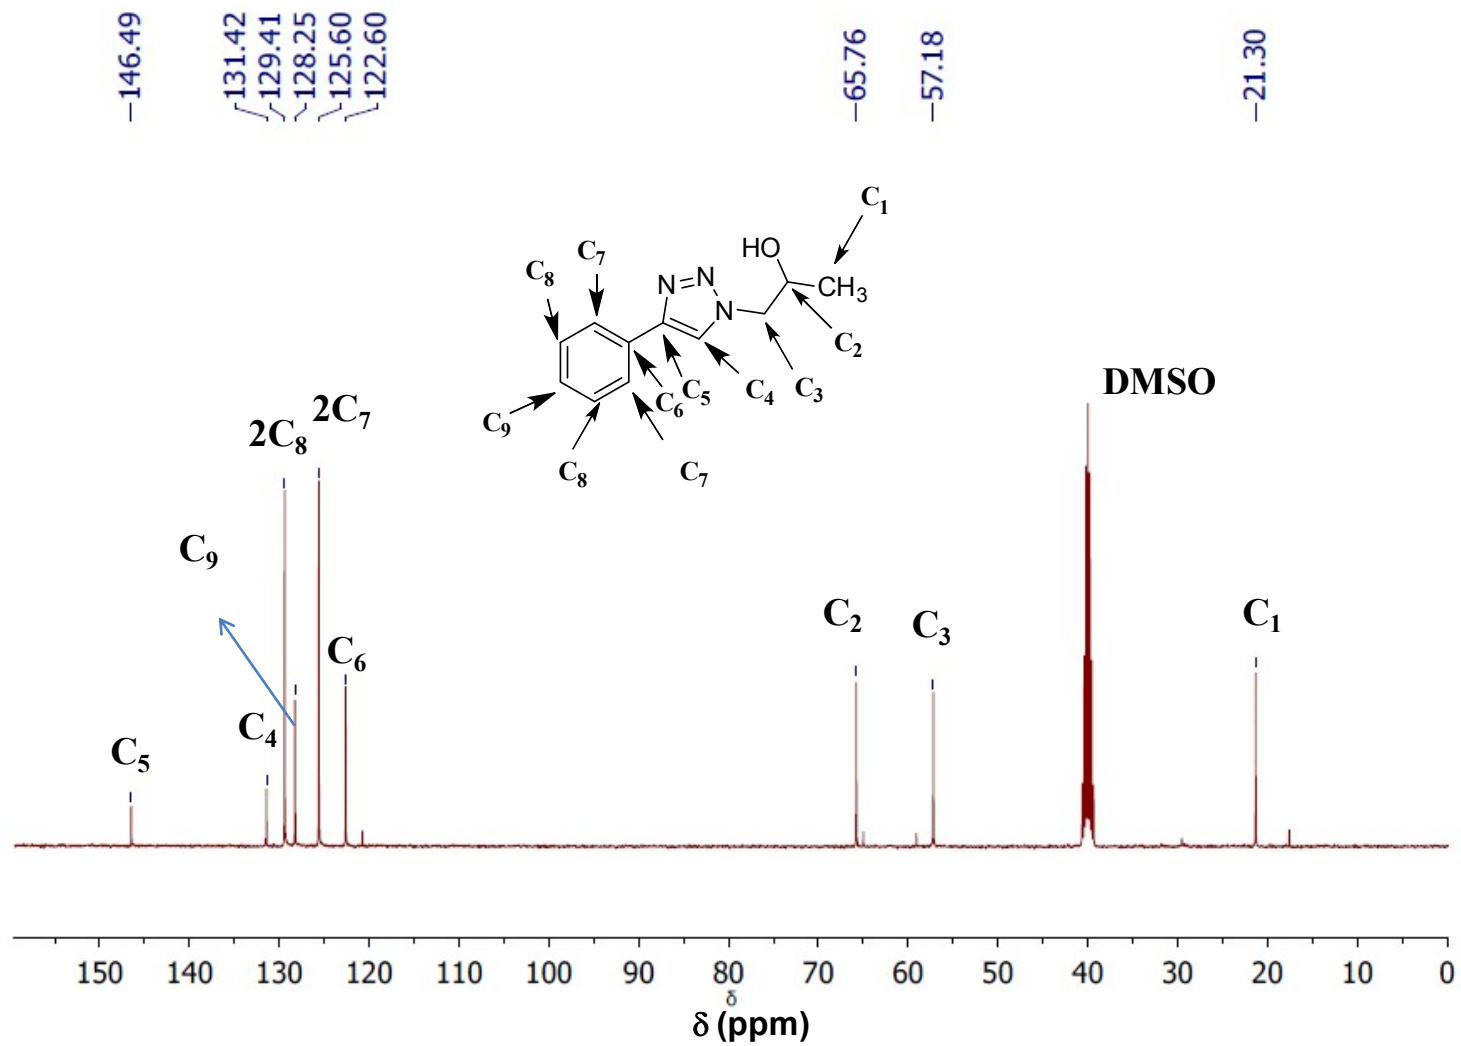

**Figure S8.** <sup>13</sup>C NMR spectrum of 1-(4-Phenyl-1H-(4-phenyl-1,2,3-triazol-1-yl)propan-2-ol).

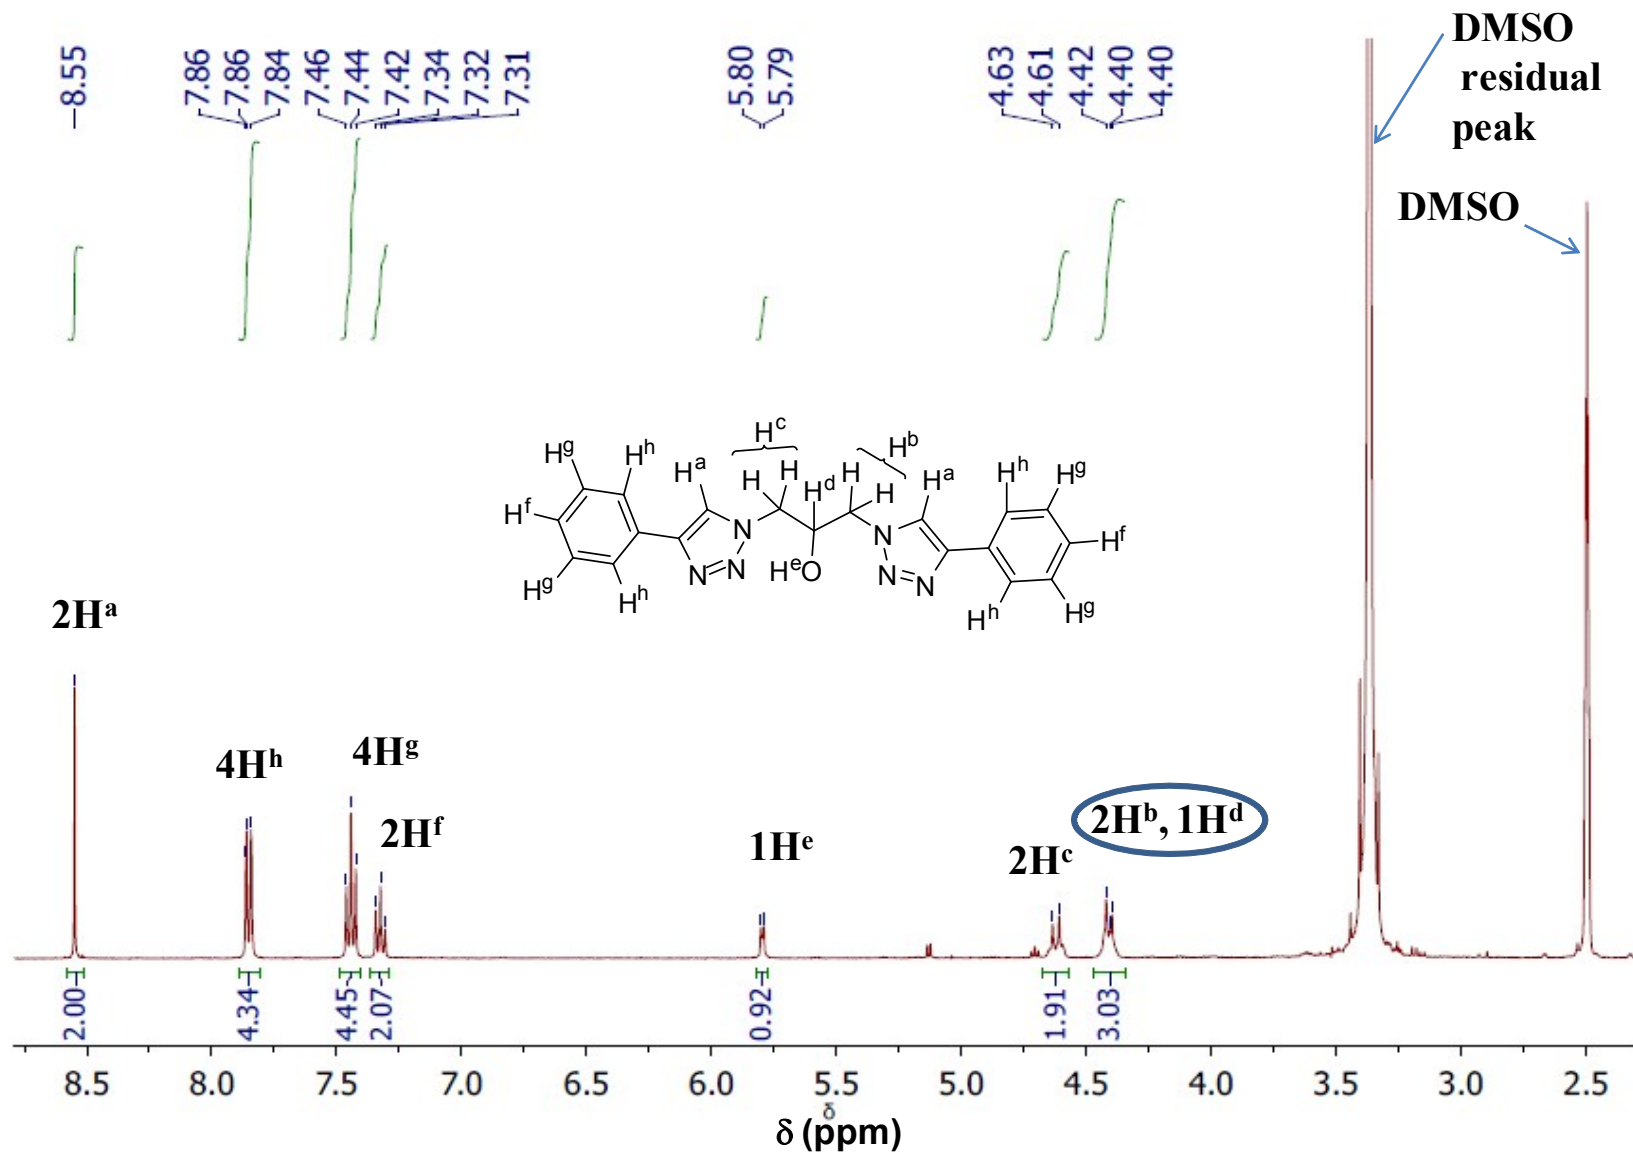

Figure S9.  $^1H$  NMR spectrum of 1,3-bis(5-phenyl-1H-1,2,3-triazol-1-yl)propan-2-ol.

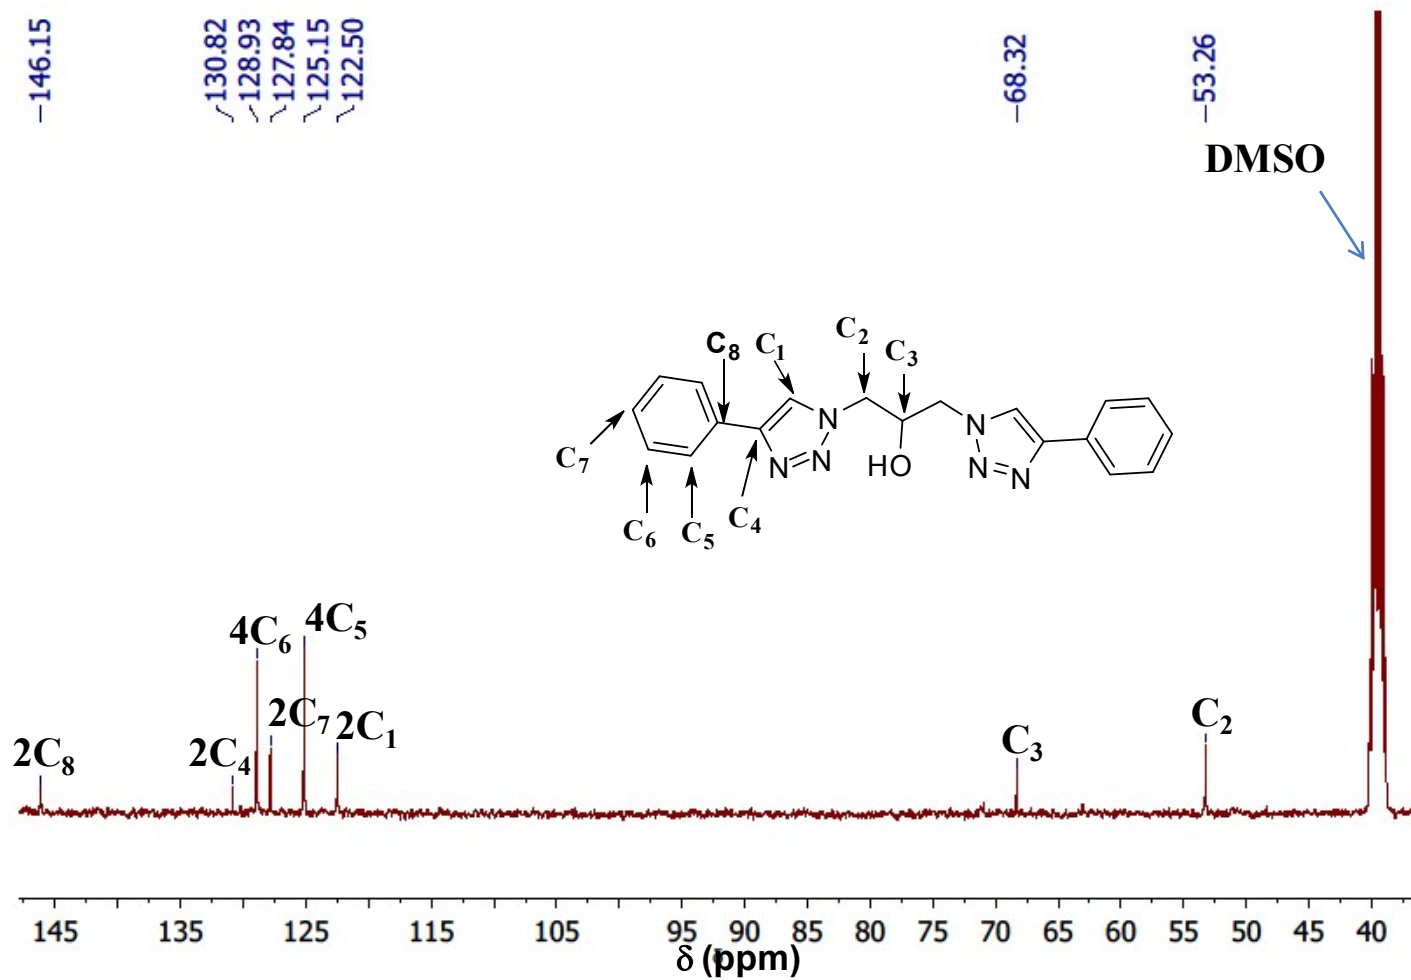

**Figure S10.** <sup>13</sup>C NMR spectrum of 1,3-bis(5-phenyl-1H-1,2,3-triazol-1-yl)propan-2-ol.

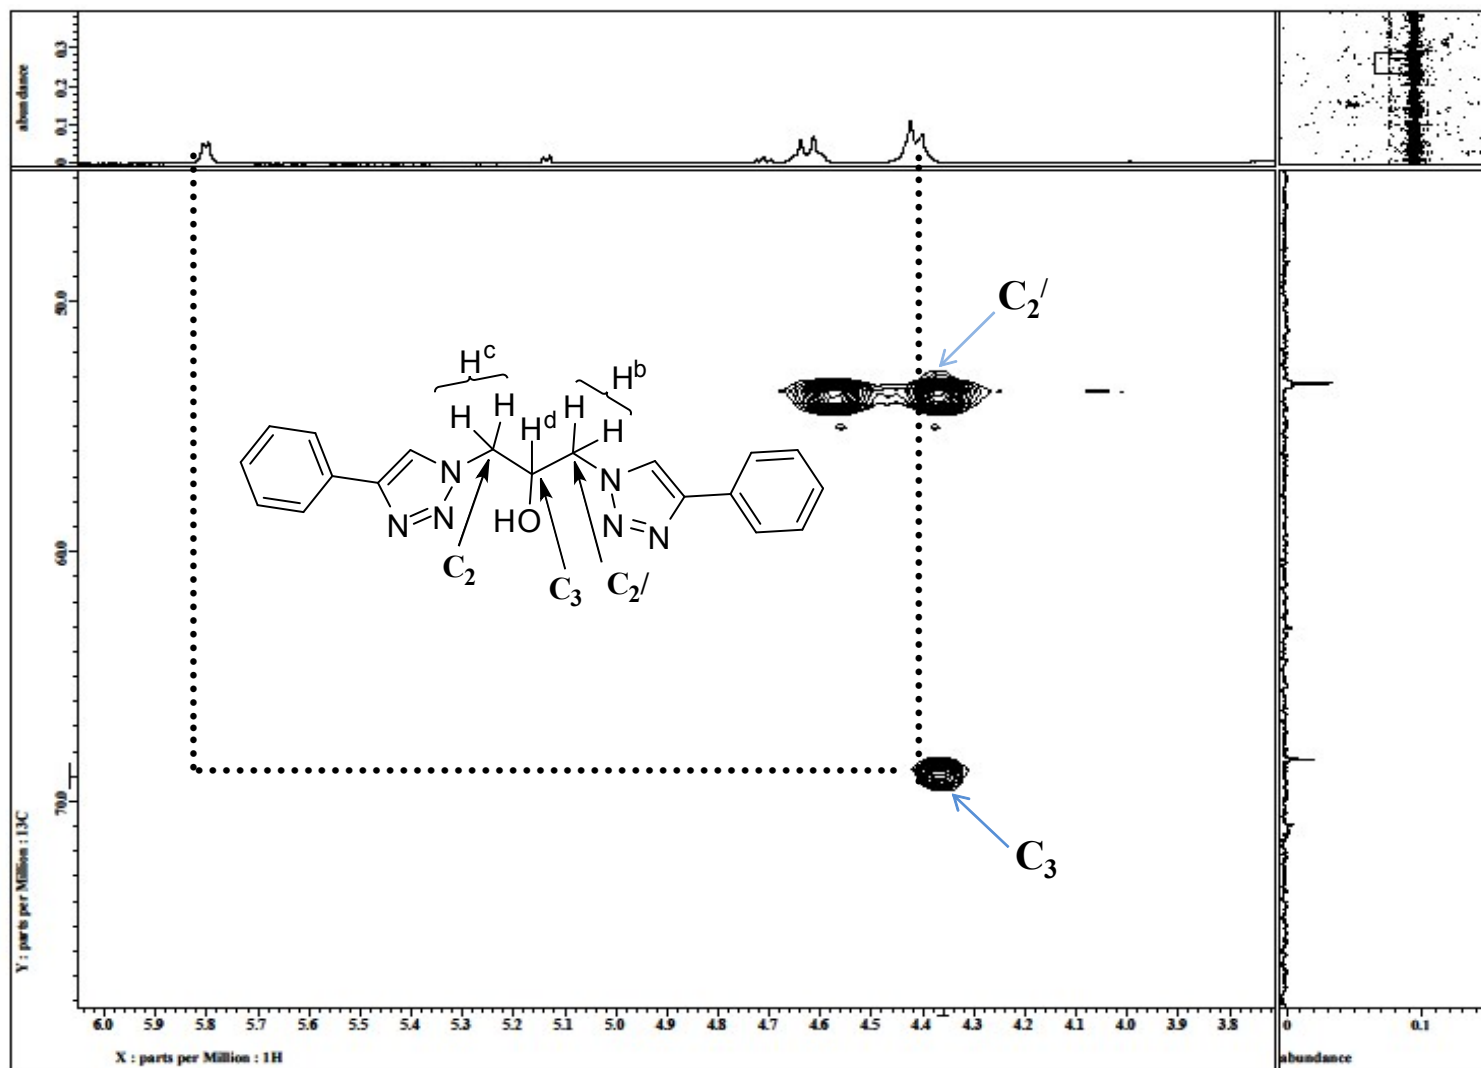

**Figure S11.**  $^1\text{H}$ - $^{13}\text{C}$  HETCOR NMR spectrum of 1,3-bis(5-phenyl-1H-1,2,3-triazol-1-yl)propan-2-ol.

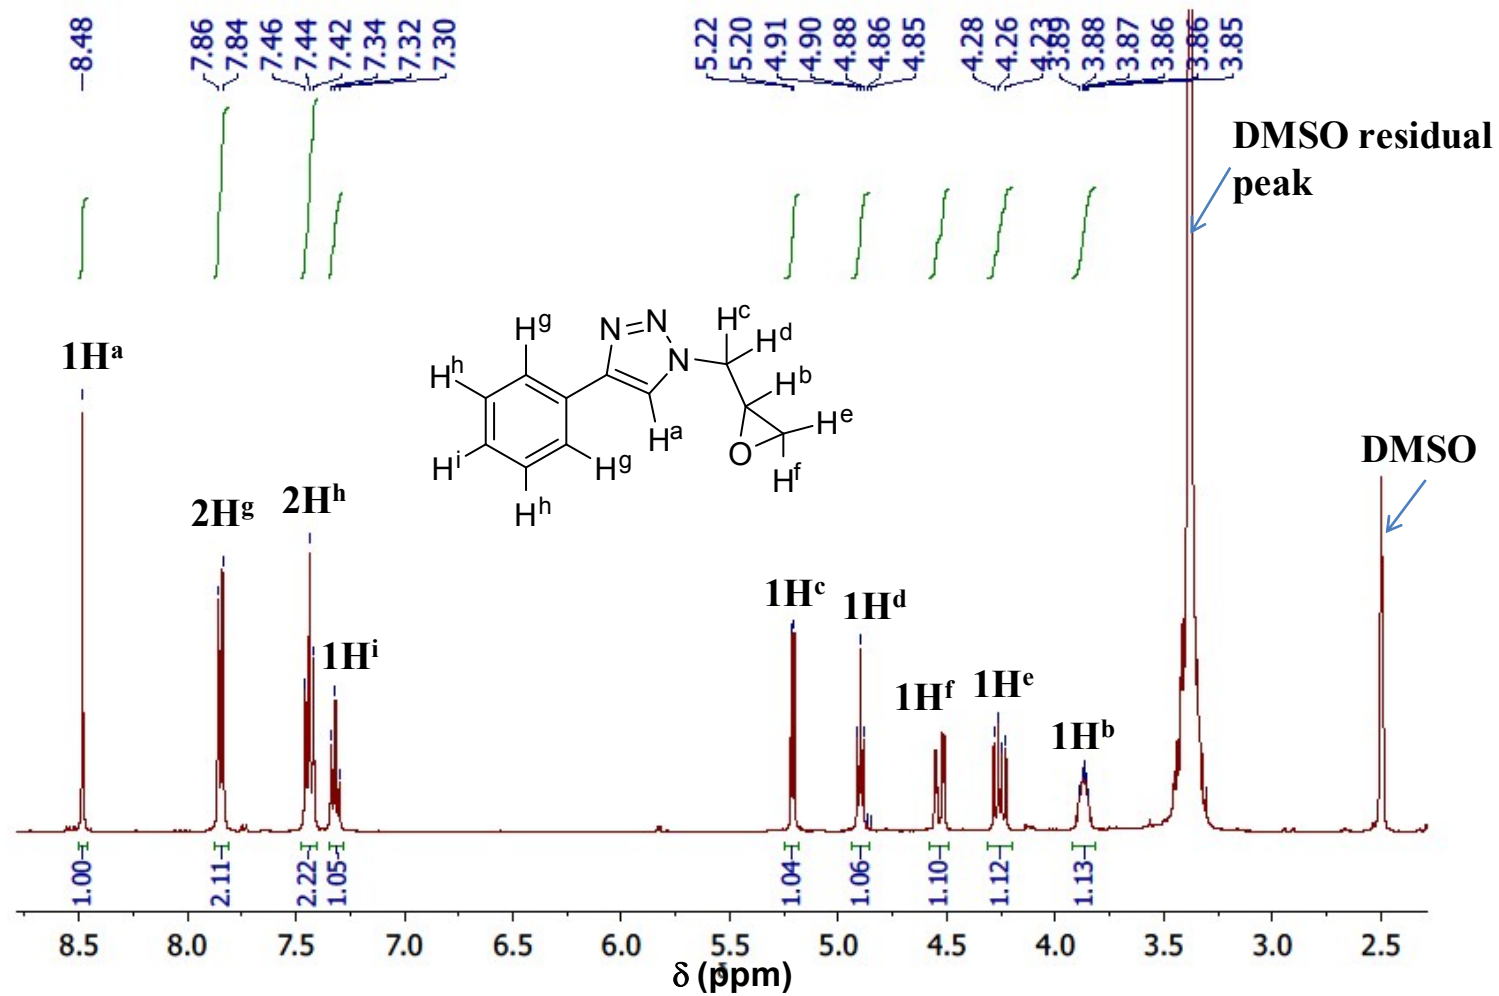

Figure S12. <sup>1</sup>H NMR spectrum of 1-(oxiran-2-ylmethyl)-4-phenyl-1H-1,2,3-triazole.

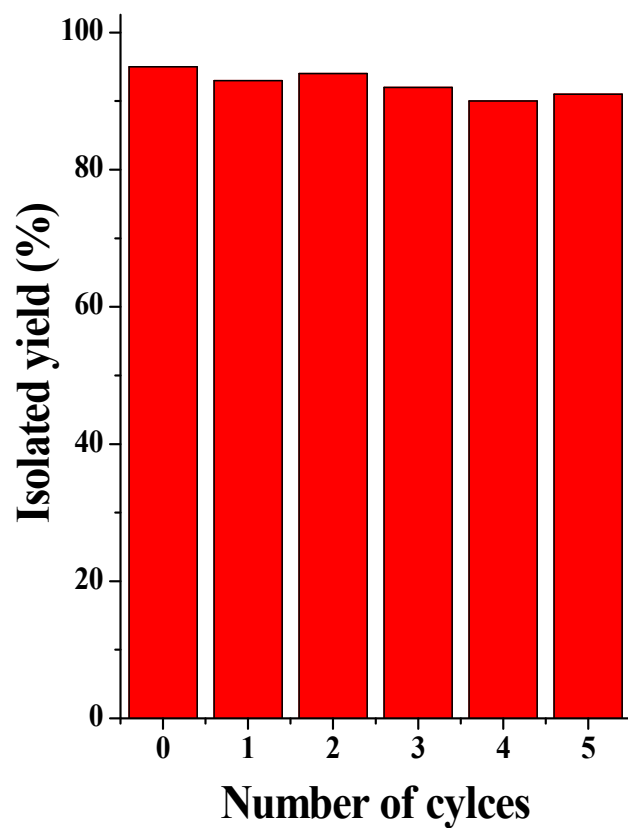

**Figure S13.** Catalytic performance of Cu(10%)/Meso-ZSM-5 during the multi-component reactions of phenyl acetylene, styrene oxide and sodium azide.
